# Supplementary material for: Synergistic Role of Micropore Structure and N/O Dual Functional Groups in Enhancing Low-Temperature NH₃-SCR Denitration over Activated Carbon Catalysts: Structural Evolution and Mechanistic Insights
Source: Research Square preprint supplement (doi:10.21203/rs.3.rs-7654843/v1), 2025-10-13
Supplement: Supplementary file 1 [file 4df09894b8030b6ec4408dd7.docx]

**Supplementary data**

**Synergistic Role of Micropore Structure and N/O Dual Functional Groups in Enhancing Low-Temperature NH₃-SCR Denitration over Activated Carbon Catalysts: Structural Evolution and Mechanistic Insights**

Jihui Yang1, Minghao Shi1, Jiahao Zheng1, Shule Zhang*1, and Qin Zhong1

1. School of Chemistry and Chemical Engineering, Nanjing University of Science and Technology, Nanjing 210094, PR China.

** Corresponding author, Tel.: +86 25 84315517*

** E-mail: shulezhang@163.com (Shule Zhang).*

**1. Experimental methods**

**1.1 Material Characterizations**

The X-ray diffraction (XRD) patterns of the samples were carried out using a D2 PHASER (Bruker, Germany) equipped with a Cu Kα radiation. The data were collected between 5-80° with a step size of 0.02°. The morphology was studied by field emission scanning transmission microscopy (FESEM, JEOL, JSM-7800F PRIME, Japan). The Brunauer-Emmett-Teller (BET) specific surface area measurements were determined on an automatic aperture analyzer (Micromeritics, ASAP 2460). The chemical compositions of the samples were determined by X-ray photoelectron spectroscopy (XPS, Perkin Elmer, PHI-5000C ESCA system, America) with Al Kα radiation (hν = 1486.6 eV), and all the data were corrected by the C 1s adventitious located at 284.4 eV.

Ammonia temperature-programmed desorption and Mass Spectrometry (NH3-TPD&MS), Nitrogen monoxide temperature-programmed desorption and Mass Spectrometry (NH3-TPD&MS) were performed on an automated catalyst characterization system (Micromeritics, AutoChem II 2920, America) equipped with a thermal conductivity detector (TCD) and mass spectrometry (HPR-20 EGA, Hiden Analytical, U. K.).

In situ FTIR experiments were carried out by a Nicolet IZ10 FTIR spectrometer, equipped with a liquid-nitrogen cooled MCT detector. Prior to each experiment, background was taken by recording the IR spectrum of KBr in a N2 stream at 300 °C, and had been deducted for each spectrum. During the experiment, 32 scans were averaged for each IR spectra, which were recorded at a resolution of 4 cm−1; each catalyst was preheated at 240 °C for 60 min under at a flow of 40 mL min−1 before experiments; the total flow rate of gas was 40 mL min−1; the concentration of NO, NH3, and O2 in mixture gas were 500 ppm, 500 ppm, and 10 vol%, respectively. In the NH3 or NO + O2 adsorption experiment, the catalysts were heated to 120 °C at a rate of 10 °C min−1, and the background spectra of catalysts were respectively recorded. The adsorption of NH3 (NO + O2) was conducted at 120 °C, and the spectra of catalyst were recorded as a function of time. For the reaction of pre-absorbed NH3 (NO + O2) with NO + O2 (NH3), the catalysts were heated to 120 °C in a rate of 10 °C min−1, the NO + O2 (NH3) introduced after NH3 (NO + O2) pre-absorbed for 60 min, the spectra of catalyst recorded as a function of time.

**1.2 Catalytic tests**

Evaluate the NH3-SCR activity of the catalyst using a fixed-bed quartz tube reactor filled with 1ml and 2ml of catalyst. The reaction conditions were set to maintain a total flow rate of 150 mL min-1, equivalent to a GHSV of 9000 h⁻¹ and 4500 h⁻¹, with the following concentrations: 500 ppm NH3, 500 ppm NO, 10% O2, balanced with N2. The reaction was carried out from 120 to 240 °C, and each measuring point of the powder catalyst was insulated for 50 min to obtain stable sampling data, and then the product gas was analyzed by a Thermo NO*x* analyzer.

**
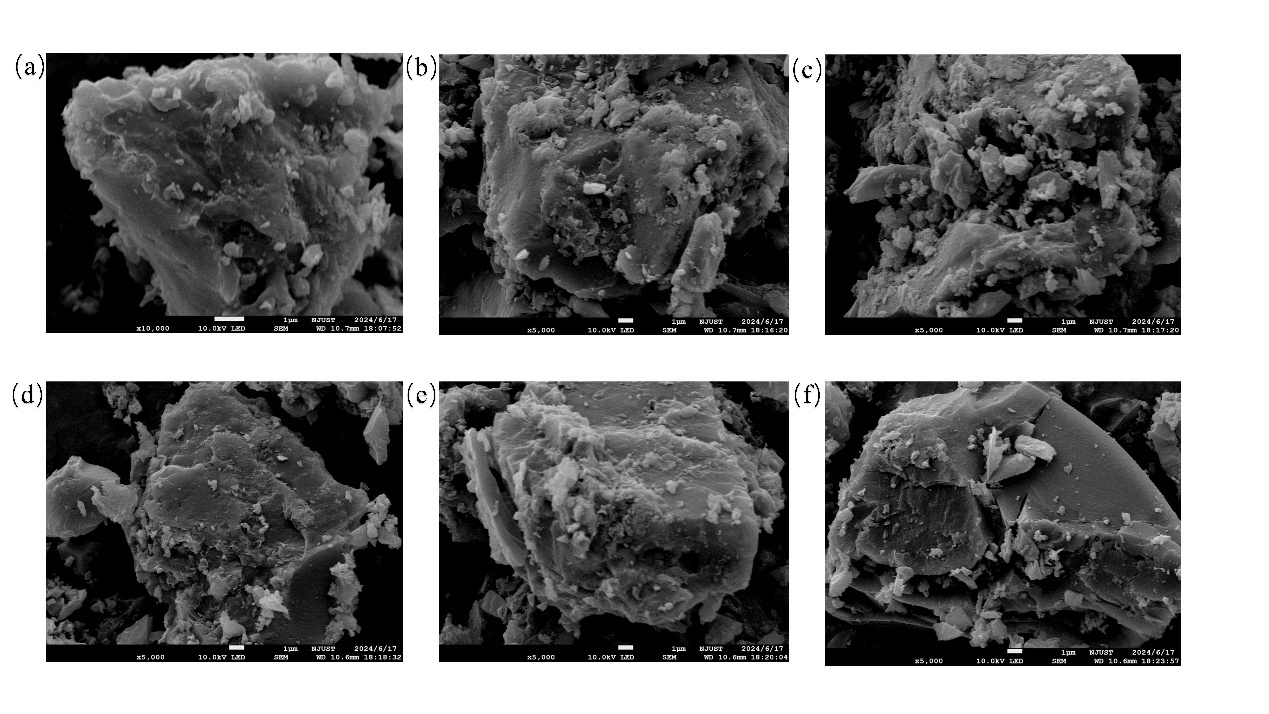
**

Fig. S1The SEM images of (a)OAC, and (b) NOAC-400 and (c) NOAC-500 and (d) NOAC-700 and (e) NOAC-800 and (f) NOAC-900.

**
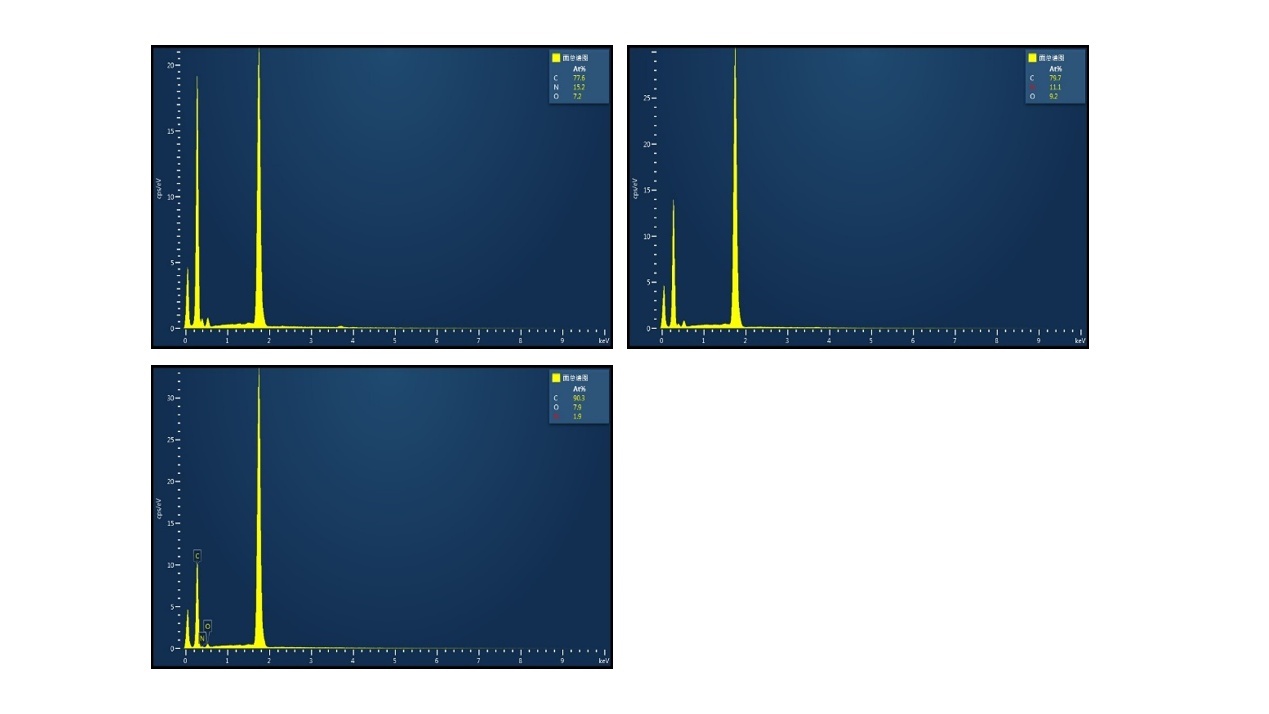
**

Fig. S2The EDS images of NOAC-400, NOAC-600 and NOAC-800.


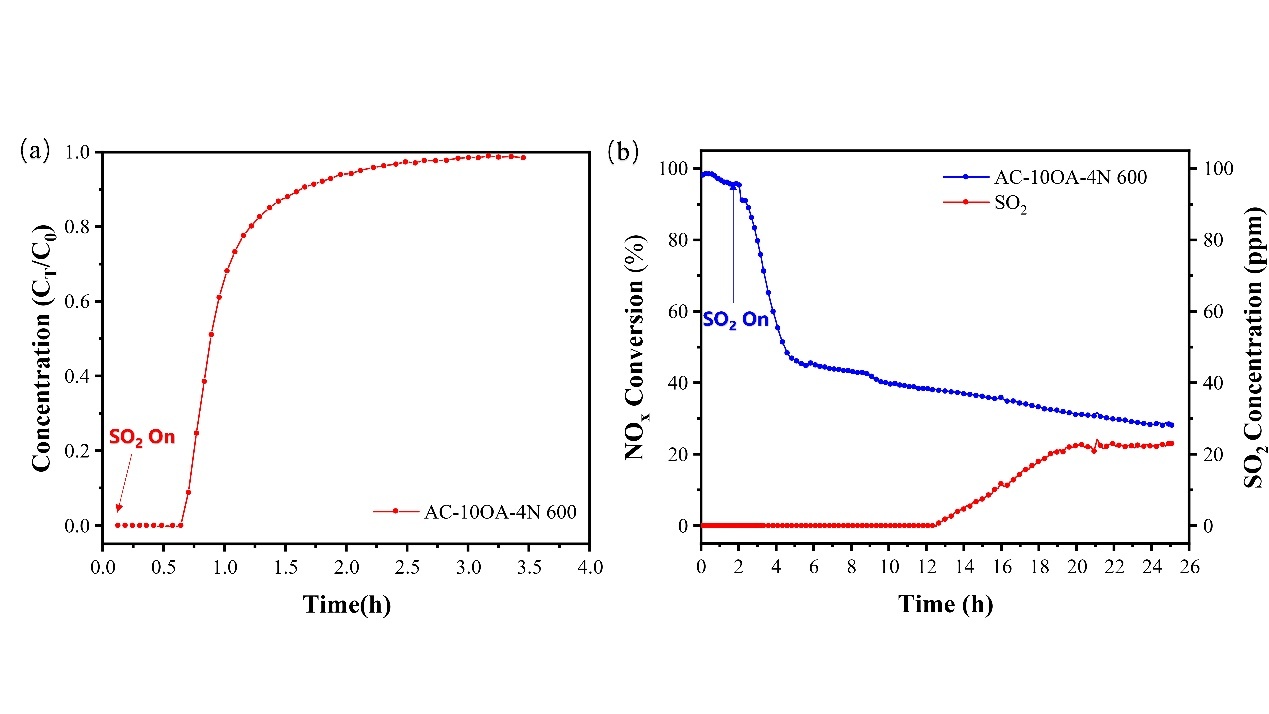


Fig. S3 (a)SO2 Breakthrough Curve of NOAC-600 and (b) SO₂ tolerance tests of NOAC-60.
